# Supplementary material for: Cross-sectional study of ethnic differences in physical fitness among children of South Asian, black African–Caribbean and white European origin: the Child Heart and Health Study in England (CHASE)
Source: PubMed Central journal article supplement (PMC4916632; doi:10.1136/bmjopen-2016-011131), 2016-06-20
Supplement: bmjopen-2016-011131supp.pdf [file bmjopen-2016-011131supp.pdf]

## Supplementary material

### Supplementary Figure 1: Distribution of estimated $VO_{2\text{ max}}$

Supplementary Table 1: Distribution of estimated  $VO_{2\text{ max}}$  (ml  $O_2$ /min/kg) by sex and ethnic group

| Ethnic group or sub-group | All children |      |     | Boys |      |     | Girls |      |     |
|---------------------------|--------------|------|-----|------|------|-----|-------|------|-----|
|                           | n            | Mean | SD  | N    | Mean | SD  | N     | Mean | SD  |
| All children              | 1625         | 39.4 | 4.5 | 825  | 40.9 | 4.4 | 800   | 37.8 | 4.0 |
| White European            | 424          | 39.6 | 4.6 | 231  | 40.7 | 4.6 | 193   | 38.2 | 4.2 |
| South Asian               | 407          | 38.5 | 4.4 | 200  | 39.9 | 4.3 | 207   | 37.1 | 4.1 |
| Indian                    | 111          | 37.6 | 4.8 | 64   | 39.1 | 4.9 | 47    | 35.7 | 4.0 |
| Pakistani                 | 147          | 38.6 | 3.9 | 77   | 39.9 | 3.7 | 70    | 37.1 | 3.6 |
| Bangladeshi               | 121          | 39.1 | 4.4 | 49   | 41.0 | 4.3 | 72    | 37.8 | 4.0 |
| Black African-Caribbean   | 413          | 40.1 | 4.4 | 208  | 41.8 | 4.1 | 205   | 38.3 | 3.9 |
| Black African             | 230          | 40.4 | 4.5 | 113  | 42.4 | 4.1 | 117   | 38.5 | 4.1 |
| Black Caribbean           | 148          | 39.7 | 4.1 | 76   | 41.0 | 4.1 | 72    | 38.3 | 3.8 |
| Other                     | 381          | 39.3 | 4.5 | 186  | 41.0 | 4.4 | 195   | 37.7 | 3.9 |

South Asian other and black other subgroups are not included in the table therefore the numbers in the subgroups do not add up to the main ethnic group totals for South Asians and black African-Caribbeans

Supplementary Table 2: Ethnic differences in physical activity and adiposity

| Outcome                   | Mean/geometric mean* (95% CI), p-value for difference from white Europeans |                    |                         |                    |         |                                      |                    |        |                    |                    |       |
|---------------------------|----------------------------------------------------------------------------|--------------------|-------------------------|--------------------|---------|--------------------------------------|--------------------|--------|--------------------|--------------------|-------|
|                           | White European<br>(n = 324)                                                |                    | South Asian<br>(n =278) |                    |         | Black African-Caribbean<br>(n = 320) |                    |        | Other<br>(n = 293) |                    |       |
| Counts                    | 401,758                                                                    | (392,024, 411,491) | 381,981                 | (370,884, 393,078) | 0.002   | 414,900                              | (405,040, 424,761) | 0.02   | 394,651            | (384,606, 404,696) | 0.22  |
| CPM                       | 501                                                                        | (488, 513)         | 459                     | (445, 473)         | <0.0001 | 500                                  | (488, 513)         | 0.96   | 478                | (465, 491)         | 0.002 |
| Steps                     | 10,356                                                                     | (10,144, 10,567)   | 9,550                   | (9,311, 9,788)     | <0.0001 | 9,928                                | (9,714, 10,142)    | <0.001 | 10,000             | (9,782, 10,217)    | 0.002 |
| MVPA (min)                | 71                                                                         | (68, 74)           | 65                      | (62, 68)           | <0.0001 | 72                                   | (69, 75)           | 0.15   | 69                 | (66, 71)           | 0.05  |
| FMI (kg/m <sup>5</sup> )* | 2.10                                                                       | (2.01, 2.18)       | 2.19                    | (2.09, 2.29)       | 0.17    | 1.90                                 | (1.83, 1.98)       | <0.001 | 2.18               | (2.09, 2.27)       | 0.20  |

All means are adjusted for sex, age quartiles, month and school (random effect)

Abbreviations: CPM, counts per minute; FMI, fat mass index; MVPA, moderate to vigorous physical activity

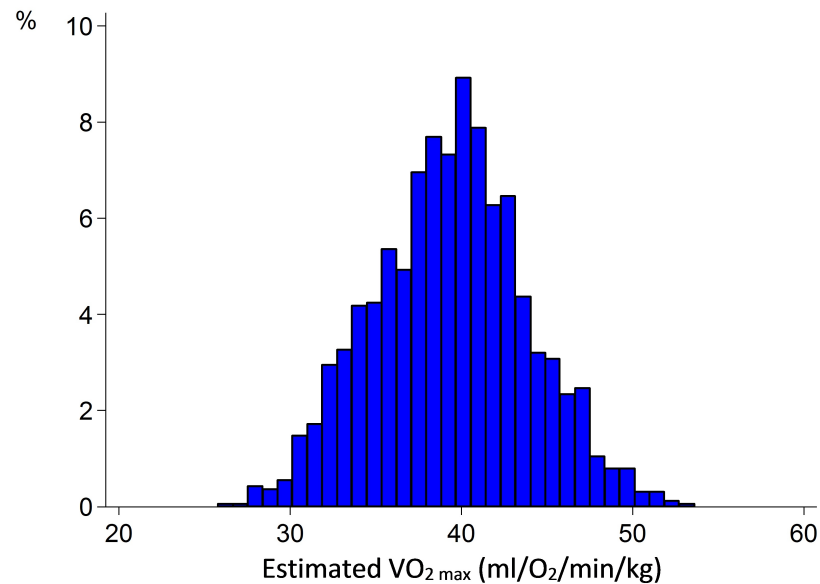

Supplementary Figure 1: Distribution of estimated VO<sub>2</sub> max
